# Supplementary material
Source: ML conference proceedings conference paper supplement (https://proceedings.mlr.press/v161/evans21a.html)
Supplement: Supplementary file [file evans21a-supp.pdf]

# Dependency in DAG models with Hidden Variables (Supplementary Material)

Robin J. Evans<sup>1</sup>

<sup>1</sup>Department of Statistics, University of Oxford, Oxford, UK

## B GRAPHS

The first concept we will need is an extension to ADMGs in which we allow some vertices to be ‘fixed’. We define the *siblings* of a vertex to be its neighbours via bidirected edges:

$$\text{sib}_{\mathcal{G}}(v) \equiv \{w : v \leftrightarrow w \text{ in } \mathcal{G}\}.$$

A CADMG  $\mathcal{G}(V, W)$  is an ADMG with a set of *random* vertices  $V$  and *fixed* vertices  $W$ , with the property that  $\text{sib}_{\mathcal{G}}(w) \cup \text{pa}_{\mathcal{G}}(w) = \emptyset$  for every  $w \in W$ . An example can be found in Figure 10(b); note that we depict fixed vertices with rectangular nodes, and random vertices with round nodes. Random vertices in a CADMG correspond to random variables, as in standard graphical models, while fixed vertices correspond to variables that were fixed to a specific value by some operation, such as conditioning or causal interventions. The genealogical relations in Section 2 generalize in a straightforward way to CADMGs by ignoring the distinction between  $V$  and  $W$ ; the only exception is that districts are only defined for random vertices, so that the districts in the graph partition only  $V$ , rather than  $V \cup W$ .

### B.1 LATENT PROJECTION

The *latent projection* of a CADMG  $\mathcal{G}(V \dot{\cup} L, W)$  to another graph  $\mathcal{G}'(V, W)$  is given by following the rules:

- if there is a directed path from  $a \in V \cup W$  to  $b \in V$ , and any interior vertices are in  $L$ , then add  $a \rightarrow b$ ;
- if there is a path between  $a, b \in V$  without any adjacent arrowheads, and any interior vertices are in  $L$ , that starts and ends with an arrow at  $a$  and  $b$ , then add  $a \leftrightarrow b$ .

As an example, consider the ADMG in Figure 8(a), with variable  $h$  designated as latent. Then the projection of this is given by the ADMG in Figure 8(b).

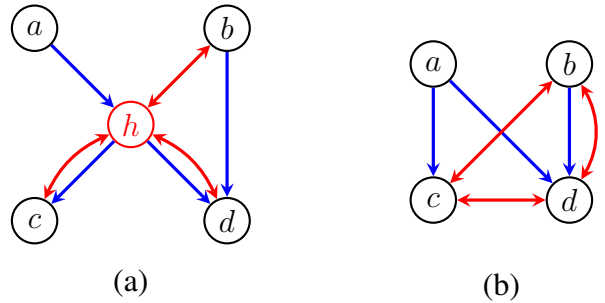

Figure 8: (a) An ADMG in which  $h$  is latent; (b) its latent projection over  $\{a, b, c, d\}$ .

### B.2 ARID PROJECTION

**Example B.1.** The *maximal arid projection* of the ADMG  $\mathcal{G}$  in Figure 9(a) is given in 9(b). In the graph (a) we have  $\langle d \rangle_{\mathcal{G}} = \{b, d\}$ , so  $\text{pa}_{\mathcal{G}}(\langle d \rangle) = \{a, b, c\}$ . As a result, in (b) all these vertices are parents of  $d$ . In addition,  $\langle \{d, e\} \rangle_{\mathcal{G}} = \{b, c, d, e\}$  which is bidirected connected, so we add the edge  $d \leftrightarrow e$  into (b). All other adjacencies are as in (a).

## C THE NESTED MARKOV MODEL

### C.1 FIXING

A vertex  $r \in V$  is said to be *fixable* in a CADMG  $\mathcal{G}(V, W)$  if  $\text{dis}_{\mathcal{G}}(r) \cap \text{de}_{\mathcal{G}}(r) = \emptyset$ . For instance, the vertices  $a, c$  and  $d$  are all fixable in the graph in Figure 10(a), but  $b$  is not because  $d$  is both its descendant and its sibling.

For any  $v \in V$ , such that  $\text{ch}_{\mathcal{G}}(v) = \emptyset$ , the *Markov blanket* of  $v$  in a CADMG  $\mathcal{G}$  is defined as

$$\text{mb}_{\mathcal{G}}(v) \equiv (\text{dis}_{\mathcal{G}}(v) \cup \text{pa}_{\mathcal{G}}(\text{dis}_{\mathcal{G}}(v))) \setminus \{v\};$$

that is, the set of vertices that are connected to  $v$  by paths with an arrow at  $v$  and two arrowheads at each internal

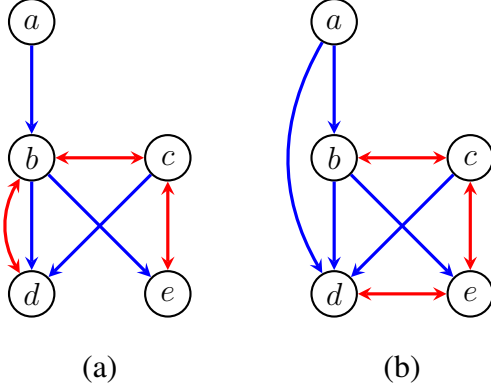

Figure 9: (a) An ADMG  $\mathcal{G}$  which is neither maximal nor arid; (b) its maximal arid projection.

vertex. We can generalize this definition to any vertex that is childless within its own district.

Given a CADMG  $\mathcal{G}(V, W)$ , and a fixable  $r \in V$ , the fixing operation  $\phi_r(\mathcal{G})$  yields a new CADMG  $\tilde{\mathcal{G}}(V \setminus \{r\}, W \cup \{r\})$  obtained from  $\mathcal{G}(V, W)$  by removing all edges of the form  $\rightarrow r$  and  $\leftrightarrow r$ , and keeping all other edges. Given a kernel  $q_V(x_V | x_W)$  associated with a CADMG  $\mathcal{G}(V, W)$ , and a fixable  $r \in V$ , the fixing operation  $\phi_r(q_V; \mathcal{G})$  yields a new kernel

$$\tilde{q}_{V \setminus \{r\}}(x_{V \setminus \{r\}} | x_W, x_r) \equiv \frac{q_V(x_V | x_W)}{q_V(x_r | x_{\text{mb}_{\mathcal{G}}(r)})}.$$

A result in Richardson et al. [2017] allows us to unambiguously define

$$\phi_R(\mathcal{G}) \equiv \phi_{r_k}(\dots \phi_{r_2}(\phi_{r_1}(\mathcal{G})) \dots),$$

and similarly the kernel  $\phi_R(p; \mathcal{G})$  for distributions that are nested Markov with respect to  $\mathcal{G}$  (defined below). Consequently, we just use sets to index fixings from now on.

If a fixing sequence exists for a set  $R \subseteq V$  in  $\mathcal{G}(V, W)$ , we say  $V \setminus R$  is a *reachable set*. Such a set is called *intrinsic* if the vertices in  $V \setminus R$  are bidirected-connected (so that  $\phi_{V \setminus R}(\mathcal{G})$  has only a single district); this definition is equivalent to the definition in the main paper. We denote the collections of reachable and intrinsic sets in  $\mathcal{G}$  respectively by  $\mathcal{R}(\mathcal{G})$  and  $\mathcal{I}(\mathcal{G})$ .

For a CADMG  $\mathcal{G}(V, W)$ , a (reachable) subset  $C \subseteq V$  is called a *reachable closure* for  $S \subseteq C$  if the set of fixable vertices in  $\phi_{V \setminus C}(\mathcal{G})$  is a subset of  $S$ . Every set  $S$  in  $\mathcal{G}$  has a unique reachable closure, which we denote  $\langle S \rangle_{\mathcal{G}}$  [Shpitser et al., 2018]. Note that this set is generally a subset of what we earlier called the ‘closure’.

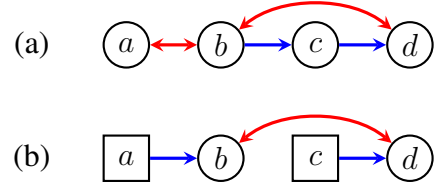

Figure 10: (a) An ADMG  $\mathcal{G}$  that is not ancestral; (b) a CADMG obtained from  $\mathcal{G}$  in (a) by fixing  $a$  and  $c$ .

## C.2 NESTED MARKOV MODEL

We are now ready to define the nested Markov model  $\mathcal{M}_n(\mathcal{G})$ . Given an ADMG  $\mathcal{G}$ , we say that a distribution  $p$  obeys the *nested Markov property* with respect to  $\mathcal{G}$  if for any reachable set  $R$ , we have that  $\phi_{V \setminus R}(p; \mathcal{G})$  factorizes into kernels as

$$\phi_{V \setminus R}(p; \mathcal{G}) = \prod_{D \in \mathcal{D}(\phi_{V \setminus R}(\mathcal{G}))} \phi_{V \setminus D}(p; \mathcal{G}).$$

In other words, for any reachable graph, the associated kernel factorizes into a product of the districts in that graph conditional on the parents of those districts.

Note that this also means that  $\phi_{V \setminus R}(p; \mathcal{G})$  will be Markov with respect to the CADMG  $\phi_{V \setminus R}(\mathcal{G})$  for each reachable set  $R$ ; see Richardson [2003] for more details on this.

**Example C.1.** Consider the ADMG in Figure 10(a). The vertices  $a$ ,  $c$  and  $d$  all satisfy the condition of being fixable, but  $b$  does not since  $d$  is both a descendant of, and in the same district as,  $b$ . The CADMG  $\mathcal{G}(\{b, d\}, \{a, c\})$  obtained after fixing  $a$  and  $c$  is shown in Figure 10(b). Notice that fixing  $c$  removes the edge  $b \rightarrow c$ , but that the edge  $c \rightarrow d$  is preserved. Applying m-separation to the graph shown in Figure 10(b), yields

$$X_d \perp\!\!\!\perp X_a \mid X_c \quad [\phi_{ac}(p(x_{abcd}); \mathcal{G})].$$

In addition, one can see easily that if an edge  $a \rightarrow d$  had been present in the original graph, then we would not have obtained this m-separation.

## C.3 DENSELY CONNECTED VERTICES

Here we give a couple of slightly more detailed examples than in the main text.

**Example C.2.** The vertices  $a$  and  $c$  in Figure 1(b) are ‘densely connected’, because they cannot be separated by any combination of conditioning or fixing, except by fixing  $c$  (which just amounts to marginalizing it from the graph). Separately, for ‘gadget’ graph in Figure 2(b) the vertices  $c$  and  $d$  are also ‘densely connected’. Naturally, any pair of vertices joined by an edge is also densely connected.

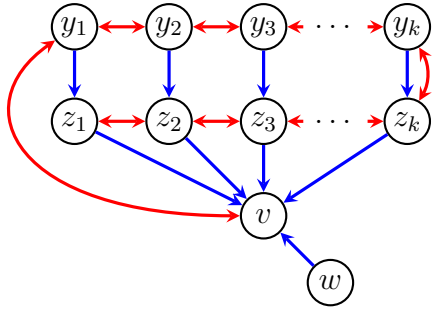

SEMs obey the nested Markov property. In *Proceedings of the 34th Conference on Uncertainty in Artificial Intelligence (UAI-18)*, pages 735–745, 2018.

Figure 11: An ADMG for which a search for a set to satisfy Proposition 5.3 is computationally difficult.

## D ALGORITHMS

### D.1 SPANNING TREE

Given a set  $C$  and its subset of childless nodes  $B$  (in our case this will be either  $\{v\}$  or  $\{v, w\}$ ), pick a topological order on the vertices that places all elements of  $B$  at the end. Then, the last vertex before  $B$  must be a parent of some element of  $B$ ; pick the largest such element under the topological order.

We then move backwards in the topological order, and each time a vertex has more than one child, we join it to the vertex which has the shortest path to an element of  $B$ ; if there is a tie, then we pick the largest element under the topological order. This ensures that each vertex is joined to  $B$  by the shortest possible directed path.

### D.2 DIFFICULT GRAPHS

Consider the graph shown in Figure 11. This can clearly be reduced to the graph  $w \rightarrow v$ , but the application of Proposition 5.3 is computationally difficult. Note that no subset will work apart from  $\{z_1, \dots, z_k\}$ , and there are  $3^k - 1$  possible sets to choose.

Algorithm 1 (with complexity proven to be  $O(|V|)$ ) can be applied instead and will immediately return the graph  $w \rightarrow v$ .

## References

- T. S. Richardson. Markov properties for acyclic directed mixed graphs. *Scandinavian Journal of Statistics*, 30(1): 145–157, 2003.
- T. S. Richardson, R. J. Evans, J. M. Robins, and I. Shpitser. Nested Markov properties for acyclic directed mixed graphs. arXiv:1701.06686, 2017.
- I. Shpitser, R. J. Evans, and T. S. Richardson. Acyclic linear
